# Supplementary material for: Analysis and visualization of energy densities. II. Insights from linear-response time-dependent density functional theory calculations
Source: Royal Society of Chemistry journal article supplement (doi:10.1039/d0cp04207b), 2020-01-01
Supplement: d0cp04207b1.pdf [file d0cp04207b1.pdf]

# Analysis and Visualization of Energy Densities. II. Insights from Linear-Response Time-Dependent Density Functional Theory Calculations. **Electronic Supplementary Information**

Zheng Pei<sup>a,#</sup>, Junjie Yang<sup>b,#</sup>, Jingheng Deng<sup>b</sup>, Yuezhi Mao<sup>c</sup>, Qin Wu<sup>d</sup>,  
Zhibo Yang<sup>b</sup>, Bin Wang<sup>e</sup>, Christine M. Aikens<sup>f</sup>, Wanzhen Liang<sup>\*a</sup>, and Yihan Shao<sup>\*b</sup>

---

<sup>a</sup> State Key Laboratory of Physical Chemistry of Solid Surfaces, Collaborative Innovation Center of Chemistry for Energy Materials, Fujian Provincial Key Laboratory of Theoretical and Computational Chemistry, and Department of Chemistry, College of Chemistry and Chemical Engineering, Xiamen University, Xiamen 361005, P. R. China. E-mail: liangwz@xmu.edu.cn

<sup>b</sup> Department of Chemistry and Biochemistry, University of Oklahoma, 101 Stephenson Pkwy, Norman, OK 73019, United States. E-mail: yihan.shao@ou.edu

<sup>c</sup> Department of Chemistry, Stanford University, Stanford, CA 94305, United States.

<sup>d</sup> Center for Functional Nanomaterials, Brookhaven National Laboratory, Upton, NY 11973, United States.

<sup>e</sup> Center for Interfacial Reaction Engineering and School of Chemical, Biological, and Materials Engineering, Gallogly College of Engineering, University of Oklahoma, Norman, OK 73019, United States.

<sup>f</sup> Department of Chemistry, Kansas State University, Manhattan, KS 66506, United States.

# These two authors contributed equally to this work.

# 1 Natural Transition Orbitals

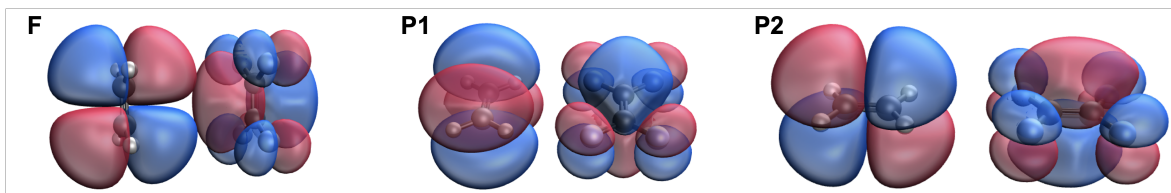

Figure S1: Natural transition orbitals of the lowest charge transfer excited-states of three  $\text{C}_2\text{H}_4\text{-C}_2\text{F}_4$  configurations from LR-TDDFT calculations with PBE0 functional and 6-31G(d) basis set.

# 2 Partition Results

All charge and energy density calculations were carried out by PYSCF. The only exceptions are FBH charges from LR-TDDFT- $\omega$ B97X-D relaxed difference densities, which were obtained from Q-CHEM calculations.

In Tables S1–S9, the Tozer  $\Lambda$  factor, overlap between attachment and detachment density matrices ( $S_{\text{DA}}$ ), fragment-based Hirshfeld partitions of excited-state charge ( $Q_{\text{FBH}}$ ) and excitation energy density (kinetic  $\omega_{\text{FBH,T}}$  and total  $\omega_{\text{FBH}}$ ), and excitation energy ( $\omega$ ) were listed.

Table S1: LR-TDDFT Results of  $C_2H_4-C_2F_4$   $\mathbf{F}$  configuration using the PBE functional.

| Basis         | ES# | $\Lambda$ | $S_{DA}$ | $Q_{FBH}$ (au) |          | $\omega_{FBH,T}$ (eV) |          | $\omega_{FBH}$ (eV) |          | $\omega$ (eV) |
|---------------|-----|-----------|----------|----------------|----------|-----------------------|----------|---------------------|----------|---------------|
|               |     |           |          | $C_2H_4$       | $C_2F_4$ | $C_2H_4$              | $C_2F_4$ | $C_2H_4$            | $C_2F_4$ |               |
| 6-31G(d)      | 1   | 0.058     | 0.018    | -0.998         | 0.998    | 34.908                | -69.401  | -0.415              | 5.425    | 5.009         |
|               | 2   | 0.625     | 0.630    | 0.001          | -0.001   | -0.037                | 13.541   | 0.002               | 6.788    | 6.790         |
|               | 3   | 0.060     | 0.035    | 0.998          | -0.998   | -28.689               | 69.786   | 6.411               | 0.403    | 6.814         |
|               | 4   | 0.017     | 0.021    | 0.998          | -0.998   | -28.675               | 83.322   | 6.401               | 1.155    | 7.556         |
|               | 5   | 0.024     | 0.018    | -0.999         | 0.999    | 25.113                | -69.385  | 2.665               | 5.414    | 8.078         |
| 6-31+G(d)     | 1   | 0.102     | 0.058    | -0.963         | 0.963    | 28.829                | -67.045  | -1.048              | 6.190    | 5.142         |
|               | 2   | 0.394     | 0.377    | -0.209         | 0.209    | 1.569                 | -55.080  | 0.035               | 5.630    | 5.664         |
|               | 3   | 0.546     | 0.528    | -0.062         | 0.062    | 0.330                 | -18.787  | 0.079               | 6.120    | 6.198         |
|               | 4   | 0.212     | 0.207    | 0.797          | -0.797   | -26.583               | 14.795   | 6.811               | -0.549   | 6.262         |
|               | 5   | 0.347     | 0.312    | -0.460         | 0.460    | 3.816                 | -55.659  | 0.254               | 6.203    | 6.456         |
| 6-311G(d,p)   | 1   | 0.084     | 0.029    | -0.995         | 0.995    | 34.292                | -69.792  | -0.832              | 5.859    | 5.028         |
|               | 2   | 0.092     | 0.056    | 0.993          | -0.993   | -28.789               | 70.380   | 6.734               | -0.010   | 6.725         |
|               | 3   | 0.625     | 0.629    | 0.000          | 0.000    | -0.045                | 12.413   | 0.012               | 6.727    | 6.739         |
|               | 4   | 0.096     | 0.078    | -0.981         | 0.981    | 16.717                | -69.312  | 1.135               | 5.870    | 7.006         |
|               | 5   | 0.035     | 0.044    | 0.993          | -0.993   | -28.751               | 82.549   | 6.716               | 0.682    | 7.398         |
| 6-311++G(d,p) | 1   | 0.101     | 0.056    | -0.967         | 0.967    | 29.608                | -67.861  | -1.160              | 6.283    | 5.123         |
|               | 2   | 0.360     | 0.335    | -0.383         | 0.384    | 2.561                 | -58.752  | -0.145              | 5.790    | 5.644         |
|               | 3   | 0.534     | 0.504    | -0.152         | 0.152    | 0.761                 | -24.058  | 0.055               | 6.153    | 6.207         |
|               | 4   | 0.236     | 0.315    | 0.522          | -0.522   | -23.291               | 5.039    | 6.119               | 0.120    | 6.239         |
|               | 5   | 0.254     | 0.327    | -0.485         | 0.486    | 1.792                 | -55.009  | 0.595               | 5.671    | 6.266         |
| cc-pVDZ       | 1   | 0.069     | 0.025    | -0.997         | 0.997    | 34.188                | -69.392  | -0.700              | 5.596    | 4.895         |
|               | 2   | 0.626     | 0.630    | 0.001          | -0.001   | -0.045                | 12.748   | 0.004               | 6.763    | 6.767         |
|               | 3   | 0.074     | 0.054    | 0.995          | -0.995   | -28.522               | 70.053   | 6.630               | 0.236    | 6.866         |
|               | 4   | 0.053     | 0.044    | -0.994         | 0.994    | 20.026                | -69.248  | 1.650               | 5.595    | 7.245         |
|               | 5   | 0.026     | 0.032    | 0.996          | -0.996   | -28.513               | 82.537   | 6.616               | 0.963    | 7.578         |
| aug-cc-pVDZ   | 1   | 0.088     | 0.056    | -0.965         | 0.965    | 29.155                | -66.769  | -1.150              | 6.147    | 4.996         |
|               | 2   | 0.344     | 0.320    | -0.395         | 0.395    | 2.503                 | -58.731  | -0.173              | 5.657    | 5.483         |
|               | 3   | 0.484     | 0.438    | -0.243         | 0.243    | 1.193                 | -35.561  | 0.055               | 6.030    | 6.084         |
|               | 4   | 0.257     | 0.267    | -0.577         | 0.577    | 3.875                 | -60.548  | -0.018              | 6.113    | 6.095         |
|               | 5   | 0.259     | 0.213    | -0.603         | 0.603    | 3.795                 | -61.371  | 0.056               | 6.114    | 6.170         |
| cc-pVTZ       | 1   | 0.082     | 0.034    | -0.989         | 0.989    | 32.966                | -68.558  | -0.968              | 5.936    | 4.969         |
|               | 2   | 0.623     | 0.626    | -0.001         | 0.001    | -0.026                | 10.717   | 0.014               | 6.686    | 6.701         |
|               | 3   | 0.090     | 0.067    | 0.987          | -0.987   | -28.524               | 69.541   | 6.806               | -0.051   | 6.755         |
|               | 4   | 0.138     | 0.107    | -0.962         | 0.962    | 15.478                | -67.578  | 0.953               | 5.950    | 6.904         |
|               | 5   | 0.037     | 0.044    | 0.989          | -0.989   | -28.510               | 79.898   | 6.793               | 0.586    | 7.379         |
| aug-cc-pVTZ   | 1   | 0.086     | 0.055    | -0.966         | 0.966    | 29.365                | -67.372  | -1.173              | 6.158    | 4.986         |
|               | 2   | 0.340     | 0.317    | -0.379         | 0.379    | 2.307                 | -59.421  | -0.183              | 5.649    | 5.466         |
|               | 3   | 0.240     | 0.244    | -0.596         | 0.596    | 3.806                 | -62.127  | -0.065              | 6.123    | 6.058         |
|               | 4   | 0.464     | 0.414    | -0.272         | 0.272    | 1.234                 | -39.149  | 0.030               | 6.040    | 6.070         |
|               | 5   | 0.246     | 0.206    | -0.585         | 0.585    | 3.424                 | -62.254  | 0.014               | 6.124    | 6.138         |

Table S2: LR-TDDFT Results of C<sub>2</sub>H<sub>4</sub>-C<sub>2</sub>F<sub>4</sub> **F** configuration using the PBE0 functional.

| Basis         | ES# | $\Lambda$ | S <sub>DA</sub> | Q <sub>FBH</sub> (au)         |                               | $\omega_{\text{FBH,T}}$ (eV)  |                               | $\omega_{\text{FBH}}$ (eV)    |                               | $\omega$ (eV) |
|---------------|-----|-----------|-----------------|-------------------------------|-------------------------------|-------------------------------|-------------------------------|-------------------------------|-------------------------------|---------------|
|               |     |           |                 | C <sub>2</sub> H <sub>4</sub> | C <sub>2</sub> F <sub>4</sub> | C <sub>2</sub> H <sub>4</sub> | C <sub>2</sub> F <sub>4</sub> | C <sub>2</sub> H <sub>4</sub> | C <sub>2</sub> F <sub>4</sub> |               |
| 6-31G(d)      | 1   | 0.092     | 0.042           | -0.997                        | 0.997                         | 32.978                        | -66.021                       | 0.315                         | 6.698                         | 7.012         |
|               | 2   | 0.623     | 0.631           | 0.000                         | 0.000                         | -0.012                        | 15.975                        | -0.003                        | 7.129                         | 7.125         |
|               | 3   | 0.163     | 0.311           | 0.930                         | -0.930                        | -26.069                       | 61.985                        | 7.274                         | 0.952                         | 8.226         |
|               | 4   | 0.787     | 0.949           | 0.067                         | -0.067                        | 1.570                         | 4.361                         | 7.691                         | 0.715                         | 8.406         |
|               | 5   | 0.534     | 0.586           | 0.001                         | -0.001                        | 5.829                         | 0.029                         | 8.497                         | 0.010                         | 8.508         |
| 6-31+G(d)     | 1   | 0.361     | 0.409           | -0.134                        | 0.134                         | 0.816                         | -50.094                       | 0.086                         | 6.361                         | 6.447         |
|               | 2   | 0.437     | 0.575           | -0.022                        | 0.022                         | 0.085                         | -4.582                        | 0.037                         | 6.668                         | 6.705         |
|               | 3   | 0.162     | 0.164           | -0.867                        | 0.867                         | 21.596                        | -61.994                       | -0.438                        | 7.284                         | 6.845         |
|               | 4   | 0.243     | 0.322           | 0.474                         | -0.474                        | -22.956                       | 6.358                         | 7.327                         | -0.204                        | 7.123         |
|               | 5   | 0.276     | 0.419           | -0.271                        | 0.271                         | 4.284                         | -44.913                       | 0.516                         | 6.997                         | 7.512         |
| 6-311G(d,p)   | 1   | 0.134     | 0.067           | -0.992                        | 0.992                         | 32.028                        | -66.135                       | -0.095                        | 7.067                         | 6.972         |
|               | 2   | 0.620     | 0.630           | 0.000                         | 0.000                         | -0.015                        | 14.972                        | -0.001                        | 7.077                         | 7.075         |
|               | 3   | 0.590     | 0.776           | 0.416                         | -0.416                        | -10.663                       | 27.598                        | 7.671                         | 0.388                         | 8.059         |
|               | 4   | 0.353     | 0.645           | 0.575                         | -0.575                        | -14.922                       | 39.095                        | 7.789                         | 0.407                         | 8.195         |
|               | 5   | 0.550     | 0.631           | 0.002                         | -0.002                        | 4.692                         | 0.065                         | 8.219                         | 0.019                         | 8.238         |
| 6-311++G(d,p) | 1   | 0.302     | 0.405           | -0.179                        | 0.179                         | 0.894                         | -51.070                       | 0.047                         | 6.432                         | 6.479         |
|               | 2   | 0.368     | 0.579           | -0.025                        | 0.025                         | 0.083                         | -3.867                        | 0.026                         | 6.702                         | 6.728         |
|               | 3   | 0.171     | 0.158           | -0.883                        | 0.883                         | 22.745                        | -62.888                       | -0.530                        | 7.377                         | 6.847         |
|               | 4   | 0.252     | 0.310           | 0.240                         | -0.240                        | -22.340                       | 2.446                         | 6.969                         | -0.071                        | 6.898         |
|               | 5   | 0.287     | 0.210           | -0.694                        | 0.694                         | 3.955                         | -60.926                       | -0.051                        | 7.482                         | 7.430         |
| cc-pVDZ       | 1   | 0.109     | 0.056           | -0.995                        | 0.995                         | 32.109                        | -65.978                       | 0.035                         | 6.856                         | 6.890         |
|               | 2   | 0.623     | 0.630           | 0.001                         | -0.001                        | -0.018                        | 15.292                        | -0.004                        | 7.105                         | 7.100         |
|               | 3   | 0.624     | 0.827           | 0.350                         | -0.350                        | -8.292                        | 23.025                        | 7.664                         | 0.514                         | 8.177         |
|               | 4   | 0.551     | 0.608           | 0.001                         | -0.001                        | 5.371                         | 0.048                         | 8.259                         | 0.016                         | 8.275         |
|               | 5   | 0.298     | 0.600           | 0.644                         | -0.644                        | -16.787                       | 43.557                        | 7.732                         | 0.573                         | 8.305         |
| aug-cc-pVDZ   | 1   | 0.278     | 0.392           | -0.187                        | 0.188                         | 0.966                         | -51.489                       | 0.010                         | 6.321                         | 6.330         |
|               | 2   | 0.338     | 0.555           | -0.039                        | 0.039                         | 0.133                         | -9.783                        | 0.033                         | 6.644                         | 6.677         |
|               | 3   | 0.136     | 0.158           | -0.857                        | 0.857                         | 21.499                        | -61.909                       | -0.511                        | 7.216                         | 6.704         |
|               | 4   | 0.247     | 0.308           | 0.236                         | -0.236                        | -22.580                       | 2.201                         | 6.939                         | -0.096                        | 6.843         |
|               | 5   | 0.280     | 0.202           | -0.675                        | 0.675                         | 3.489                         | -60.481                       | -0.125                        | 7.357                         | 7.231         |
| cc-pVTZ       | 1   | 0.120     | 0.073           | -0.985                        | 0.985                         | 30.348                        | -64.971                       | -0.251                        | 7.090                         | 6.839         |
|               | 2   | 0.614     | 0.627           | 0.000                         | 0.000                         | -0.009                        | 13.710                        | 0.002                         | 7.040                         | 7.043         |
|               | 3   | 0.818     | 0.911           | 0.075                         | -0.075                        | -1.800                        | 4.493                         | 7.737                         | 0.192                         | 7.929         |
|               | 4   | 0.554     | 0.614           | 0.004                         | -0.004                        | 3.550                         | 0.085                         | 8.104                         | 0.026                         | 8.130         |
|               | 5   | 0.366     | 0.394           | -0.001                        | 0.001                         | -12.073                       | -0.715                        | 8.007                         | 0.169                         | 8.177         |
| aug-cc-pVTZ   | 1   | 0.268     | 0.383           | -0.184                        | 0.184                         | 0.898                         | -52.434                       | -0.007                        | 6.302                         | 6.295         |
|               | 2   | 0.319     | 0.545           | -0.046                        | 0.046                         | 0.142                         | -11.685                       | 0.028                         | 6.650                         | 6.679         |
|               | 3   | 0.132     | 0.157           | -0.853                        | 0.853                         | 21.419                        | -62.315                       | -0.530                        | 7.211                         | 6.682         |
|               | 4   | 0.233     | 0.301           | 0.242                         | -0.242                        | -22.970                       | 2.179                         | 6.941                         | -0.098                        | 6.843         |
|               | 5   | 0.257     | 0.191           | -0.667                        | 0.667                         | 3.135                         | -61.272                       | -0.162                        | 7.339                         | 7.177         |

Table S3: LR-TDDFT Results of C<sub>2</sub>H<sub>4</sub>-C<sub>2</sub>F<sub>4</sub> **F** configuration using the  $\omega$ B97X-D functional.

| Basis         | ES# | $\Lambda$ | S <sub>DA</sub> | Q <sub>FBH</sub> (au)         |                               | $\omega_{\text{FBH,T}}$ (eV)  |                               | $\omega_{\text{FBH}}$ (eV)    |                               | $\omega$ (eV) |
|---------------|-----|-----------|-----------------|-------------------------------|-------------------------------|-------------------------------|-------------------------------|-------------------------------|-------------------------------|---------------|
|               |     |           |                 | C <sub>2</sub> H <sub>4</sub> | C <sub>2</sub> F <sub>4</sub> | C <sub>2</sub> H <sub>4</sub> | C <sub>2</sub> F <sub>4</sub> | C <sub>2</sub> H <sub>4</sub> | C <sub>2</sub> F <sub>4</sub> |               |
| 6-31G(d)      | 1   | 0.622     | 0.631           | 0.000                         | 0.000                         | -0.007                        | 16.853                        | -0.003                        | 7.178                         | 7.175         |
|               | 2   | 0.862     | 0.956           | -0.007                        | 0.007                         | 3.955                         | -0.717                        | 7.604                         | 0.746                         | 8.350         |
|               | 3   | 0.534     | 0.578           | 0.001                         | -0.001                        | 5.931                         | 0.017                         | 8.561                         | 0.010                         | 8.572         |
|               | 4   | 0.815     | 0.939           | -0.035                        | 0.035                         | 1.562                         | -5.014                        | 0.805                         | 7.793                         | 8.597         |
|               | 5   | 0.156     | 0.223           | -0.953                        | 0.953                         | 31.247                        | -62.875                       | 1.122                         | 7.637                         | 8.758         |
| 6-31+G(d)     | 1   | 0.323     | 0.428           | -0.099                        | 0.099                         | 0.583                         | -48.302                       | 0.097                         | 6.701                         | 6.797         |
|               | 2   | 0.385     | 0.597           | -0.013                        | 0.013                         | 0.047                         | 2.353                         | 0.022                         | 6.843                         | 6.864         |
|               | 3   | 0.267     | 0.396           | 0.176                         | -0.176                        | -19.655                       | 1.592                         | 7.489                         | 0.066                         | 7.556         |
|               | 4   | 0.715     | 0.831           | 0.040                         | -0.040                        | -7.177                        | -0.056                        | 7.398                         | 0.252                         | 7.650         |
|               | 5   | 0.281     | 0.423           | -0.228                        | 0.228                         | 2.724                         | -42.921                       | 0.137                         | 7.693                         | 7.830         |
| 6-311G(d,p)   | 1   | 0.616     | 0.631           | 0.000                         | 0.000                         | -0.010                        | 16.013                        | -0.003                        | 7.138                         | 7.135         |
|               | 2   | 0.845     | 0.942           | -0.002                        | 0.002                         | 2.647                         | -0.302                        | 7.808                         | 0.257                         | 8.064         |
|               | 3   | 0.551     | 0.606           | 0.001                         | -0.001                        | 5.034                         | 0.035                         | 8.289                         | 0.018                         | 8.308         |
|               | 4   | 0.691     | 0.898           | -0.158                        | 0.158                         | 4.633                         | -12.355                       | 0.355                         | 8.171                         | 8.527         |
|               | 5   | 0.393     | 0.414           | 0.005                         | -0.005                        | -11.055                       | 0.075                         | 8.517                         | 0.024                         | 8.541         |
| 6-311++G(d,p) | 1   | 0.264     | 0.433           | -0.107                        | 0.107                         | 0.531                         | -48.761                       | 0.094                         | 6.727                         | 6.821         |
|               | 2   | 0.410     | 0.600           | -0.012                        | 0.012                         | 0.038                         | 3.105                         | 0.016                         | 6.868                         | 6.883         |
|               | 3   | 0.239     | 0.327           | 0.101                         | -0.101                        | -21.287                       | 0.491                         | 7.136                         | 0.056                         | 7.192         |
|               | 4   | 0.608     | 0.844           | 0.039                         | -0.039                        | -6.250                        | 0.118                         | 7.402                         | 0.205                         | 7.607         |
|               | 5   | 0.186     | 0.358           | 0.059                         | -0.059                        | -20.640                       | 0.390                         | 7.770                         | 0.080                         | 7.850         |
| cc-pVDZ       | 1   | 0.621     | 0.631           | 0.000                         | 0.000                         | -0.012                        | 16.301                        | -0.005                        | 7.165                         | 7.160         |
|               | 2   | 0.851     | 0.949           | -0.007                        | 0.007                         | 3.066                         | -0.628                        | 7.792                         | 0.371                         | 8.163         |
|               | 3   | 0.551     | 0.594           | 0.001                         | -0.001                        | 5.601                         | 0.028                         | 8.335                         | 0.016                         | 8.351         |
|               | 4   | 0.595     | 0.864           | -0.284                        | 0.284                         | 8.396                         | -19.501                       | 0.596                         | 7.937                         | 8.533         |
|               | 5   | 0.340     | 0.503           | -0.701                        | 0.701                         | 23.244                        | -48.050                       | 0.662                         | 7.983                         | 8.645         |
| aug-cc-pVDZ   | 1   | 0.249     | 0.424           | -0.110                        | 0.110                         | 0.548                         | -48.926                       | 0.076                         | 6.619                         | 6.694         |
|               | 2   | 0.384     | 0.587           | -0.017                        | 0.017                         | 0.055                         | -0.550                        | 0.022                         | 6.846                         | 6.867         |
|               | 3   | 0.228     | 0.326           | 0.103                         | -0.103                        | -21.628                       | 0.446                         | 7.083                         | 0.035                         | 7.118         |
|               | 4   | 0.632     | 0.813           | 0.024                         | -0.024                        | -6.265                        | -2.373                        | 7.007                         | 0.560                         | 7.568         |
|               | 5   | 0.212     | 0.404           | -0.217                        | 0.217                         | 1.709                         | -45.764                       | 0.461                         | 7.174                         | 7.635         |
| cc-pVTZ       | 1   | 0.610     | 0.629           | 0.000                         | 0.000                         | -0.007                        | 15.296                        | 0.000                         | 7.127                         | 7.127         |
|               | 2   | 0.831     | 0.927           | 0.000                         | 0.000                         | 0.718                         | -0.224                        | 7.694                         | 0.209                         | 7.903         |
|               | 3   | 0.553     | 0.598           | 0.003                         | -0.003                        | 3.937                         | 0.050                         | 8.185                         | 0.025                         | 8.211         |
|               | 4   | 0.432     | 0.737           | -0.488                        | 0.488                         | 13.691                        | -32.454                       | 0.411                         | 8.003                         | 8.415         |
|               | 5   | 0.371     | 0.403           | 0.007                         | -0.007                        | -11.929                       | 0.085                         | 8.426                         | 0.036                         | 8.462         |
| aug-cc-pVTZ   | 1   | 0.215     | 0.406           | -0.108                        | 0.108                         | 0.522                         | -50.915                       | 0.047                         | 6.588                         | 6.636         |
|               | 2   | 0.366     | 0.578           | -0.020                        | 0.020                         | 0.058                         | -2.607                        | 0.018                         | 6.858                         | 6.877         |
|               | 3   | 0.198     | 0.316           | 0.104                         | -0.104                        | -22.292                       | 0.474                         | 7.082                         | 0.031                         | 7.113         |
|               | 4   | 0.181     | 0.396           | -0.203                        | 0.203                         | 1.021                         | -46.412                       | 0.735                         | 6.795                         | 7.532         |
|               | 5   | 0.570     | 0.789           | 0.028                         | -0.028                        | -5.906                        | -4.960                        | 6.691                         | 0.885                         | 7.576         |

Table S4: LR-TDDFT Results of  $C_2H_4-C_2F_4$  **P1** configuration using the PBE functional.

| Basis         | ES# | $\Lambda$ | $S_{DA}$ | $Q_{FBH}$ (au) |          | $\omega_{FBH,T}$ (eV) |          | $\omega_{FBH}$ (eV) |          | $\omega$ (eV) |
|---------------|-----|-----------|----------|----------------|----------|-----------------------|----------|---------------------|----------|---------------|
|               |     |           |          | $C_2H_4$       | $C_2F_4$ | $C_2H_4$              | $C_2F_4$ | $C_2H_4$            | $C_2F_4$ |               |
| 6-31G(d)      | 1   | 0.009     | 0.003    | -0.988         | 0.988    | 34.946                | -69.454  | -0.322              | 5.538    | 5.215         |
|               | 2   | 0.009     | 0.004    | 0.988          | -0.988   | -28.726               | 69.880   | 6.317               | 0.291    | 6.609         |
|               | 3   | 0.619     | 0.620    | -0.032         | 0.032    | 0.701                 | 10.177   | 0.060               | 6.681    | 6.740         |
|               | 4   | 0.070     | 0.069    | 0.965          | -0.965   | -28.245               | 81.016   | 6.363               | 0.944    | 7.307         |
|               | 5   | 0.374     | 0.299    | -0.778         | 0.778    | 19.768                | -54.261  | 1.892               | 6.266    | 8.158         |
| 6-31+G(d)     | 1   | 0.055     | 0.019    | -0.974         | 0.974    | 29.339                | -67.359  | -0.910              | 6.283    | 5.372         |
|               | 2   | 0.407     | 0.388    | -0.168         | 0.168    | 1.882                 | -53.439  | 0.016               | 5.682    | 5.698         |
|               | 3   | 0.164     | 0.158    | 0.826          | -0.826   | -26.415               | 16.721   | 6.683               | -0.651   | 6.032         |
|               | 4   | 0.533     | 0.510    | -0.118         | 0.118    | 1.326                 | -24.071  | -0.005              | 6.170    | 6.164         |
|               | 5   | 0.057     | 0.020    | 0.976          | -0.976   | -28.075               | 68.546   | 6.660               | -0.409   | 6.251         |
| 6-311G(d,p)   | 1   | 0.013     | 0.004    | -0.984         | 0.984    | 34.390                | -69.881  | -0.708              | 5.975    | 5.267         |
|               | 2   | 0.014     | 0.006    | 0.984          | -0.984   | -28.877               | 70.651   | 6.611               | -0.121   | 6.490         |
|               | 3   | 0.580     | 0.563    | -0.179         | 0.179    | 3.017                 | -6.558   | 0.139               | 6.415    | 6.554         |
|               | 4   | 0.147     | 0.144    | 0.869          | -0.869   | -27.010               | 70.083   | 6.707               | 0.311    | 7.018         |
|               | 5   | 0.357     | 0.333    | -0.706         | 0.706    | 12.591                | -48.877  | 0.810               | 6.478    | 7.288         |
| 6-311++G(d,p) | 1   | 0.054     | 0.019    | -0.975         | 0.975    | 30.110                | -68.141  | -1.020              | 6.371    | 5.352         |
|               | 2   | 0.395     | 0.370    | -0.253         | 0.253    | 2.291                 | -55.138  | -0.067              | 5.774    | 5.707         |
|               | 3   | 0.180     | 0.175    | 0.756          | -0.756   | -26.486               | 15.921   | 6.699               | -0.658   | 6.041         |
|               | 4   | 0.526     | 0.491    | -0.170         | 0.170    | 1.413                 | -29.528  | -0.043              | 6.230    | 6.188         |
|               | 5   | 0.056     | 0.021    | 0.977          | -0.977   | -28.458               | 69.241   | 6.749               | -0.500   | 6.250         |
| cc-pVDZ       | 1   | 0.009     | 0.003    | -0.985         | 0.985    | 34.254                | -69.460  | -0.593              | 5.709    | 5.115         |
|               | 2   | 0.594     | 0.584    | -0.130         | 0.130    | 2.471                 | -0.595   | 0.148               | 6.477    | 6.625         |
|               | 3   | 0.009     | 0.005    | 0.984          | -0.984   | -28.592               | 70.272   | 6.523               | 0.127    | 6.650         |
|               | 4   | 0.128     | 0.126    | 0.902          | -0.902   | -27.076               | 73.895   | 6.622               | 0.626    | 7.248         |
|               | 5   | 0.303     | 0.287    | -0.770         | 0.770    | 16.089                | -53.135  | 1.217               | 6.254    | 7.471         |
| aug-cc-pVDZ   | 1   | 0.043     | 0.019    | -0.972         | 0.972    | 29.678                | -67.050  | -1.031              | 6.237    | 5.205         |
|               | 2   | 0.374     | 0.351    | -0.271         | 0.271    | 2.232                 | -55.830  | -0.084              | 5.630    | 5.546         |
|               | 3   | 0.188     | 0.190    | 0.729          | -0.729   | -26.184               | 13.579   | 6.669               | -0.641   | 6.028         |
|               | 4   | 0.469     | 0.415    | -0.309         | 0.309    | 2.118                 | -41.756  | -0.075              | 6.137    | 6.062         |
|               | 5   | 0.311     | 0.262    | -0.449         | 0.450    | 2.824                 | -58.093  | 0.067               | 6.162    | 6.229         |
| cc-pVTZ       | 1   | 0.019     | 0.007    | -0.982         | 0.982    | 33.160                | -68.675  | -0.843              | 6.034    | 5.191         |
|               | 2   | 0.558     | 0.532    | -0.227         | 0.227    | 3.777                 | -14.104  | 0.134               | 6.343    | 6.478         |
|               | 3   | 0.020     | 0.011    | 0.981          | -0.981   | -28.641               | 69.909   | 6.689               | -0.147   | 6.542         |
|               | 4   | 0.168     | 0.165    | 0.831          | -0.831   | -26.217               | 62.955   | 6.789               | 0.206    | 6.995         |
|               | 5   | 0.452     | 0.438    | -0.494         | 0.494    | 8.508                 | -34.796  | 0.433               | 6.704    | 7.139         |
| aug-cc-pVTZ   | 1   | 0.042     | 0.019    | -0.972         | 0.972    | 29.866                | -67.641  | -1.053              | 6.250    | 5.198         |
|               | 2   | 0.370     | 0.348    | -0.257         | 0.257    | 2.054                 | -56.759  | -0.093              | 5.632    | 5.539         |
|               | 3   | 0.181     | 0.183    | 0.742          | -0.742   | -26.587               | 13.132   | 6.679               | -0.648   | 6.031         |
|               | 4   | 0.446     | 0.389    | -0.361         | 0.361    | 2.291                 | -45.315  | -0.095              | 6.143    | 6.049         |
|               | 5   | 0.296     | 0.251    | -0.433         | 0.433    | 2.570                 | -59.290  | 0.014               | 6.198    | 6.213         |

Table S5: LR-TDDFT Results of C<sub>2</sub>H<sub>4</sub>-C<sub>2</sub>F<sub>4</sub> **P1** configuration using the PBE0 functional.

| Basis         | ES# | $\Lambda$ | S <sub>DA</sub> | Q <sub>FBH</sub> (au)         |                               | $\omega_{\text{FBH,T}}$ (eV)  |                               | $\omega_{\text{FBH}}$ (eV)    |                               | $\omega$ (eV) |
|---------------|-----|-----------|-----------------|-------------------------------|-------------------------------|-------------------------------|-------------------------------|-------------------------------|-------------------------------|---------------|
|               |     |           |                 | C <sub>2</sub> H <sub>4</sub> | C <sub>2</sub> F <sub>4</sub> | C <sub>2</sub> H <sub>4</sub> | C <sub>2</sub> F <sub>4</sub> | C <sub>2</sub> H <sub>4</sub> | C <sub>2</sub> F <sub>4</sub> |               |
| 6-31G(d)      | 1   | 0.611     | 0.628           | -0.010                        | 0.010                         | 0.194                         | 14.812                        | 0.026                         | 7.074                         | 7.099         |
|               | 2   | 0.015     | 0.006           | -0.990                        | 0.990                         | 33.109                        | -66.323                       | 0.426                         | 6.819                         | 7.244         |
|               | 3   | 0.015     | 0.018           | 0.990                         | -0.990                        | -28.144                       | 66.750                        | 7.193                         | 0.848                         | 8.042         |
|               | 4   | 0.880     | 0.958           | 0.000                         | 0.000                         | 3.521                         | -0.384                        | 7.502                         | 0.884                         | 8.386         |
|               | 5   | 0.533     | 0.597           | 0.002                         | -0.002                        | 5.757                         | 0.145                         | 8.520                         | -0.012                        | 8.508         |
| 6-31+G(d)     | 1   | 0.381     | 0.418           | -0.100                        | 0.101                         | 0.975                         | -48.722                       | 0.057                         | 6.420                         | 6.476         |
|               | 2   | 0.410     | 0.575           | -0.040                        | 0.040                         | 0.409                         | -5.725                        | 0.014                         | 6.694                         | 6.707         |
|               | 3   | 0.207     | 0.258           | 0.597                         | -0.597                        | -23.290                       | 10.649                        | 7.249                         | -0.299                        | 6.950         |
|               | 4   | 0.165     | 0.045           | -0.973                        | 0.973                         | 25.436                        | -64.514                       | -0.269                        | 7.433                         | 7.163         |
|               | 5   | 0.295     | 0.393           | -0.152                        | 0.152                         | 1.197                         | -43.490                       | 0.124                         | 7.335                         | 7.458         |
| 6-311G(d,p)   | 1   | 0.497     | 0.616           | -0.039                        | 0.039                         | 0.553                         | 10.231                        | 0.049                         | 6.952                         | 7.001         |
|               | 2   | 0.025     | 0.010           | -0.987                        | 0.987                         | 32.319                        | -66.575                       | 0.048                         | 7.191                         | 7.239         |
|               | 3   | 0.028     | 0.039           | 0.985                         | -0.985                        | -28.161                       | 67.177                        | 7.422                         | 0.498                         | 7.921         |
|               | 4   | 0.250     | 0.397           | 0.308                         | -0.308                        | -16.117                       | 17.695                        | 7.710                         | 0.380                         | 8.090         |
|               | 5   | 0.864     | 0.945           | 0.002                         | -0.002                        | 2.436                         | -0.002                        | 7.879                         | 0.234                         | 8.114         |
| 6-311++G(d,p) | 1   | 0.359     | 0.417           | -0.139                        | 0.139                         | 1.130                         | -48.816                       | 0.024                         | 6.485                         | 6.509         |
|               | 2   | 0.384     | 0.579           | -0.031                        | 0.031                         | 0.288                         | -5.908                        | 0.007                         | 6.728                         | 6.734         |
|               | 3   | 0.250     | 0.271           | 0.416                         | -0.415                        | -23.203                       | 7.259                         | 7.068                         | -0.235                        | 6.833         |
|               | 4   | 0.245     | 0.047           | -0.975                        | 0.975                         | 26.273                        | -65.081                       | -0.360                        | 7.517                         | 7.158         |
|               | 5   | 0.263     | 0.252           | 0.298                         | -0.298                        | -23.019                       | 4.821                         | 7.460                         | -0.120                        | 7.339         |
| cc-pVDZ       | 1   | 0.545     | 0.621           | -0.028                        | 0.028                         | 0.448                         | 12.022                        | 0.046                         | 6.997                         | 7.042         |
|               | 2   | 0.014     | 0.007           | -0.988                        | 0.988                         | 32.314                        | -66.336                       | 0.161                         | 6.977                         | 7.137         |
|               | 3   | 0.016     | 0.038           | 0.986                         | -0.986                        | -27.990                       | 67.006                        | 7.356                         | 0.699                         | 8.056         |
|               | 4   | 0.868     | 0.952           | 0.001                         | -0.001                        | 2.745                         | -0.077                        | 7.851                         | 0.366                         | 8.217         |
|               | 5   | 0.544     | 0.638           | 0.010                         | -0.010                        | 4.930                         | 0.612                         | 8.271                         | 0.001                         | 8.273         |
| aug-cc-pVDZ   | 1   | 0.315     | 0.400           | -0.144                        | 0.144                         | 1.077                         | -50.225                       | 0.010                         | 6.352                         | 6.362         |
|               | 2   | 0.355     | 0.560           | -0.053                        | 0.053                         | 0.459                         | -10.045                       | 0.003                         | 6.685                         | 6.688         |
|               | 3   | 0.202     | 0.280           | 0.377                         | -0.377                        | -23.250                       | 5.791                         | 7.012                         | -0.229                        | 6.782         |
|               | 4   | 0.070     | 0.042           | -0.971                        | 0.971                         | 25.818                        | -64.230                       | -0.375                        | 7.379                         | 7.003         |
|               | 5   | 0.211     | 0.330           | -0.241                        | 0.241                         | 1.248                         | -50.084                       | 0.104                         | 7.115                         | 7.219         |
| cc-pVTZ       | 1   | 0.467     | 0.608           | -0.050                        | 0.050                         | 0.701                         | 7.672                         | 0.057                         | 6.906                         | 6.964         |
|               | 2   | 0.029     | 0.015           | -0.985                        | 0.985                         | 30.868                        | -65.495                       | -0.103                        | 7.197                         | 7.095         |
|               | 3   | 0.827     | 0.925           | 0.033                         | -0.033                        | -0.268                        | 2.055                         | 7.779                         | 0.176                         | 7.954         |
|               | 4   | 0.251     | 0.371           | 0.328                         | -0.327                        | -16.776                       | 15.427                        | 7.604                         | 0.363                         | 7.968         |
|               | 5   | 0.048     | 0.176           | 0.953                         | -0.953                        | -27.051                       | 64.477                        | 7.497                         | 0.522                         | 8.018         |
| aug-cc-pVTZ   | 1   | 0.303     | 0.391           | -0.135                        | 0.135                         | 0.964                         | -51.341                       | 0.001                         | 6.335                         | 6.336         |
|               | 2   | 0.333     | 0.552           | -0.064                        | 0.064                         | 0.530                         | -11.115                       | -0.003                        | 6.696                         | 6.693         |
|               | 3   | 0.189     | 0.272           | 0.381                         | -0.381                        | -23.651                       | 5.522                         | 7.020                         | -0.234                        | 6.786         |
|               | 4   | 0.064     | 0.042           | -0.970                        | 0.970                         | 25.830                        | -64.605                       | -0.399                        | 7.379                         | 6.981         |
|               | 5   | 0.191     | 0.312           | -0.224                        | 0.224                         | 1.092                         | -51.797                       | 0.050                         | 7.131                         | 7.181         |

Table S6: LR-TDDFT Results of C<sub>2</sub>H<sub>4</sub>-C<sub>2</sub>F<sub>4</sub> **P1** configuration using the  $\omega$ B97X-D functional.

| Basis         | ES# | $\Lambda$ | S <sub>DA</sub> | Q <sub>FBH</sub> (au)         |                               | $\omega_{\text{FBH,T}}$ (eV)  |                               | $\omega_{\text{FBH}}$ (eV)    |                               | $\omega$ (eV) |
|---------------|-----|-----------|-----------------|-------------------------------|-------------------------------|-------------------------------|-------------------------------|-------------------------------|-------------------------------|---------------|
|               |     |           |                 | C <sub>2</sub> H <sub>4</sub> | C <sub>2</sub> F <sub>4</sub> | C <sub>2</sub> H <sub>4</sub> | C <sub>2</sub> F <sub>4</sub> | C <sub>2</sub> H <sub>4</sub> | C <sub>2</sub> F <sub>4</sub> |               |
| 6-31G(d)      | 1   | 0.610     | 0.630           | -0.005                        | 0.005                         | 0.084                         | 16.287                        | 0.018                         | 7.142                         | 7.161         |
|               | 2   | 0.880     | 0.957           | 0.000                         | 0.000                         | 3.780                         | -0.273                        | 7.596                         | 0.752                         | 8.348         |
|               | 3   | 0.536     | 0.579           | -0.001                        | 0.001                         | 5.966                         | -0.059                        | 8.591                         | -0.019                        | 8.572         |
|               | 4   | 0.861     | 0.942           | -0.001                        | 0.001                         | 0.384                         | -2.637                        | 0.776                         | 7.822                         | 8.598         |
|               | 5   | 0.018     | 0.015           | -0.991                        | 0.991                         | 32.911                        | -66.798                       | 1.283                         | 7.723                         | 9.005         |
| 6-31+G(d)     | 1   | 0.331     | 0.434           | -0.047                        | 0.047                         | 0.404                         | -47.652                       | 0.063                         | 6.766                         | 6.829         |
|               | 2   | 0.395     | 0.602           | -0.031                        | 0.031                         | 0.279                         | 3.502                         | 0.034                         | 6.849                         | 6.883         |
|               | 3   | 0.362     | 0.373           | 0.184                         | -0.184                        | -19.147                       | 3.108                         | 7.491                         | 0.066                         | 7.557         |
|               | 4   | 0.595     | 0.838           | 0.010                         | -0.010                        | -6.976                        | 0.059                         | 7.538                         | 0.114                         | 7.652         |
|               | 5   | 0.258     | 0.445           | -0.061                        | 0.061                         | 0.458                         | -37.046                       | 0.103                         | 7.867                         | 7.969         |
| 6-311G(d,p)   | 1   | 0.475     | 0.626           | -0.014                        | 0.014                         | 0.187                         | 14.134                        | 0.032                         | 7.068                         | 7.100         |
|               | 2   | 0.864     | 0.943           | 0.001                         | -0.001                        | 2.655                         | -0.061                        | 7.854                         | 0.214                         | 8.068         |
|               | 3   | 0.555     | 0.607           | -0.001                        | 0.001                         | 5.100                         | -0.043                        | 8.328                         | -0.019                        | 8.309         |
|               | 4   | 0.291     | 0.407           | 0.088                         | -0.088                        | -12.038                       | 3.447                         | 8.253                         | 0.281                         | 8.535         |
|               | 5   | 0.849     | 0.933           | -0.001                        | 0.001                         | 0.079                         | -2.768                        | 0.230                         | 8.313                         | 8.543         |
| 6-311++G(d,p) | 1   | 0.284     | 0.437           | -0.070                        | 0.070                         | 0.521                         | -48.075                       | 0.056                         | 6.791                         | 6.847         |
|               | 2   | 0.366     | 0.604           | -0.022                        | 0.022                         | 0.180                         | 3.638                         | 0.017                         | 6.883                         | 6.900         |
|               | 3   | 0.277     | 0.320           | 0.097                         | -0.097                        | -21.501                       | 1.453                         | 7.180                         | 0.043                         | 7.222         |
|               | 4   | 0.624     | 0.849           | 0.009                         | -0.009                        | -5.985                        | 0.049                         | 7.502                         | 0.108                         | 7.610         |
|               | 5   | 0.191     | 0.253           | 0.096                         | -0.096                        | -21.964                       | 0.637                         | 7.748                         | 0.170                         | 7.918         |
| cc-pVDZ       | 1   | 0.539     | 0.627           | -0.011                        | 0.011                         | 0.157                         | 14.963                        | 0.029                         | 7.102                         | 7.131         |
|               | 2   | 0.868     | 0.950           | 0.000                         | 0.000                         | 2.927                         | -0.099                        | 7.852                         | 0.313                         | 8.165         |
|               | 3   | 0.553     | 0.594           | -0.001                        | 0.001                         | 5.647                         | -0.050                        | 8.367                         | -0.017                        | 8.350         |
|               | 4   | 0.850     | 0.933           | -0.001                        | 0.001                         | 0.129                         | -2.559                        | 0.331                         | 8.224                         | 8.554         |
|               | 5   | 0.016     | 0.018           | -0.988                        | 0.988                         | 32.097                        | -66.762                       | 1.011                         | 7.874                         | 8.884         |
| aug-cc-pVDZ   | 1   | 0.233     | 0.423           | -0.073                        | 0.073                         | 0.488                         | -48.771                       | 0.043                         | 6.678                         | 6.721         |
|               | 2   | 0.363     | 0.594           | -0.032                        | 0.032                         | 0.261                         | 1.128                         | 0.021                         | 6.869                         | 6.890         |
|               | 3   | 0.209     | 0.319           | 0.092                         | -0.092                        | -21.981                       | 1.172                         | 7.115                         | 0.018                         | 7.133         |
|               | 4   | 0.770     | 0.840           | 0.011                         | -0.011                        | -6.489                        | 0.059                         | 7.461                         | 0.109                         | 7.571         |
|               | 5   | 0.146     | 0.373           | -0.126                        | 0.126                         | 0.448                         | -45.768                       | 0.134                         | 7.601                         | 7.735         |
| cc-pVTZ       | 1   | 0.444     | 0.623           | -0.017                        | 0.017                         | 0.222                         | 13.185                        | 0.037                         | 7.057                         | 7.095         |
|               | 2   | 0.851     | 0.929           | 0.001                         | -0.001                        | 0.874                         | -0.034                        | 7.756                         | 0.156                         | 7.912         |
|               | 3   | 0.557     | 0.599           | -0.001                        | 0.001                         | 4.065                         | -0.051                        | 8.232                         | -0.018                        | 8.214         |
|               | 4   | 0.268     | 0.393           | 0.124                         | -0.124                        | -13.153                       | 4.066                         | 8.108                         | 0.346                         | 8.454         |
|               | 5   | 0.839     | 0.924           | -0.002                        | 0.002                         | 0.047                         | -2.777                        | 0.167                         | 8.311                         | 8.478         |
| aug-cc-pVTZ   | 1   | 0.201     | 0.407           | -0.070                        | 0.070                         | 0.432                         | -50.730                       | 0.032                         | 6.632                         | 6.665         |
|               | 2   | 0.321     | 0.588           | -0.038                        | 0.038                         | 0.293                         | -0.104                        | 0.019                         | 6.886                         | 6.905         |
|               | 3   | 0.184     | 0.307           | 0.088                         | -0.088                        | -22.717                       | 1.019                         | 7.107                         | 0.013                         | 7.120         |
|               | 4   | 0.743     | 0.835           | 0.012                         | -0.012                        | -6.640                        | 0.053                         | 7.459                         | 0.109                         | 7.568         |
|               | 5   | 0.123     | 0.336           | -0.107                        | 0.107                         | 0.406                         | -49.963                       | 0.056                         | 7.581                         | 7.638         |



Table S7: LR-TDDFT Results of  $C_2H_4-C_2F_4$  **P2** configuration using the PBE functional.

| Basis         | ES# | $\Lambda$ | $S_{DA}$ | $Q_{FBH}$ (au) |          | $\omega_{FBH,T}$ (eV) |          | $\omega_{FBH}$ (eV) |          | $\omega$ (eV) |
|---------------|-----|-----------|----------|----------------|----------|-----------------------|----------|---------------------|----------|---------------|
|               |     |           |          | $C_2H_4$       | $C_2F_4$ | $C_2H_4$              | $C_2F_4$ | $C_2H_4$            | $C_2F_4$ |               |
| 6-31G(d)      | 1   | 0.003     | 0.001    | -0.998         | 0.998    | 34.959                | -69.462  | -0.339              | 5.491    | 5.151         |
|               | 2   | 0.003     | 0.001    | 0.998          | -0.998   | -28.734               | 69.878   | 6.336               | 0.336    | 6.673         |
|               | 3   | 0.625     | 0.629    | -0.002         | 0.002    | 0.034                 | 13.253   | 0.008               | 6.782    | 6.789         |
|               | 4   | 0.013     | 0.015    | 0.997          | -0.997   | -28.707               | 83.235   | 6.343               | 1.069    | 7.412         |
|               | 5   | 0.532     | 0.573    | 0.000          | 0.000    | 6.378                 | -0.004   | 8.180               | -0.001   | 8.178         |
| 6-31+G(d)     | 1   | 0.025     | 0.020    | -0.981         | 0.981    | 29.215                | -67.335  | -0.935              | 6.261    | 5.326         |
|               | 2   | 0.411     | 0.393    | -0.099         | 0.099    | 0.941                 | -53.406  | 0.039               | 5.698    | 5.737         |
|               | 3   | 0.093     | 0.088    | 0.907          | -0.907   | -27.341               | 16.784   | 6.714               | -0.603   | 6.111         |
|               | 4   | 0.549     | 0.533    | -0.048         | 0.048    | 0.416                 | -17.769  | 0.056               | 6.155    | 6.211         |
|               | 5   | 0.011     | 0.005    | 0.990          | -0.990   | -28.099               | 68.617   | 6.675               | -0.380   | 6.296         |
| 6-311G(d,p)   | 1   | 0.006     | 0.002    | -0.996         | 0.996    | 34.408                | -69.897  | -0.730              | 5.927    | 5.198         |
|               | 2   | 0.007     | 0.003    | 0.995          | -0.995   | -28.889               | 70.654   | 6.635               | -0.075   | 6.560         |
|               | 3   | 0.622     | 0.625    | -0.014         | 0.014    | 0.204                 | 10.885   | 0.030               | 6.694    | 6.724         |
|               | 4   | 0.131     | 0.091    | -0.943         | 0.943    | 16.150                | -67.606  | 1.082               | 6.045    | 7.126         |
|               | 5   | 0.032     | 0.036    | 0.986          | -0.986   | -28.748               | 81.685   | 6.657               | 0.558    | 7.215         |
| 6-311++G(d,p) | 1   | 0.022     | 0.018    | -0.982         | 0.982    | 29.994                | -68.126  | -1.044              | 6.350    | 5.306         |
|               | 2   | 0.394     | 0.367    | -0.212         | 0.212    | 1.638                 | -55.815  | -0.054              | 5.810    | 5.756         |
|               | 3   | 0.124     | 0.119    | 0.823          | -0.823   | -27.249               | 15.489   | 6.728               | -0.596   | 6.132         |
|               | 4   | 0.211     | 0.194    | -0.735         | 0.735    | 5.219                 | -63.617  | -0.136              | 6.348    | 6.212         |
|               | 5   | 0.539     | 0.515    | -0.113         | 0.113    | 0.721                 | -21.590  | 0.047               | 6.169    | 6.216         |
| cc-pVDZ       | 1   | 0.004     | 0.002    | -0.996         | 0.996    | 34.271                | -69.472  | -0.616              | 5.656    | 5.039         |
|               | 2   | 0.005     | 0.003    | 0.996          | -0.996   | -28.603               | 70.270   | 6.547               | 0.179    | 6.727         |
|               | 3   | 0.624     | 0.627    | -0.008         | 0.008    | 0.135                 | 11.758   | 0.022               | 6.735    | 6.757         |
|               | 4   | 0.118     | 0.075    | -0.964         | 0.964    | 19.492                | -67.864  | 1.587               | 5.754    | 7.341         |
|               | 5   | 0.027     | 0.032    | 0.990          | -0.990   | -28.504               | 81.968   | 6.565               | 0.860    | 7.425         |
| aug-cc-pVDZ   | 1   | 0.022     | 0.019    | -0.981         | 0.981    | 29.560                | -67.036  | -1.050              | 6.213    | 5.162         |
|               | 2   | 0.370     | 0.344    | -0.250         | 0.250    | 1.763                 | -56.331  | -0.074              | 5.666    | 5.591         |
|               | 3   | 0.208     | 0.196    | -0.702         | 0.702    | 4.399                 | -62.605  | -0.163              | 6.179    | 6.015         |
|               | 4   | 0.497     | 0.462    | -0.177         | 0.177    | 1.008                 | -31.372  | 0.063               | 6.045    | 6.108         |
|               | 5   | 0.140     | 0.137    | 0.778          | -0.778   | -26.785               | 13.345   | 6.699               | -0.584   | 6.115         |
| cc-pVTZ       | 1   | 0.008     | 0.004    | -0.994         | 0.994    | 33.179                | -68.691  | -0.860              | 5.999    | 5.139         |
|               | 2   | 0.008     | 0.005    | 0.994          | -0.994   | -28.655               | 69.925   | 6.707               | -0.112   | 6.595         |
|               | 3   | 0.617     | 0.619    | -0.020         | 0.020    | 0.273                 | 8.457    | 0.041               | 6.634    | 6.676         |
|               | 4   | 0.195     | 0.142    | -0.866         | 0.866    | 14.102                | -63.823  | 0.818               | 6.169    | 6.988         |
|               | 5   | 0.039     | 0.044    | 0.979          | -0.979   | -28.458               | 78.380   | 6.740               | 0.452    | 7.191         |
| aug-cc-pVTZ   | 1   | 0.022     | 0.019    | -0.981         | 0.981    | 29.748                | -67.627  | -1.073              | 6.227    | 5.155         |
|               | 2   | 0.365     | 0.341    | -0.226         | 0.226    | 1.509                 | -57.287  | -0.077              | 5.640    | 5.564         |
|               | 3   | 0.195     | 0.182    | -0.716         | 0.716    | 4.258                 | -63.702  | -0.194              | 6.189    | 5.995         |
|               | 4   | 0.131     | 0.127    | 0.796          | -0.796   | -27.230               | 12.794   | 6.716               | -0.617   | 6.099         |
|               | 5   | 0.485     | 0.447    | -0.187         | 0.187    | 1.006                 | -33.877  | 0.038               | 6.068    | 6.107         |

Table S8: LR-TDDFT Results of C<sub>2</sub>H<sub>4</sub>-C<sub>2</sub>F<sub>4</sub> **P2** configuration using the PBE0 functional.

| Basis         | ES# | $\Lambda$ | S <sub>DA</sub> | Q <sub>FBH</sub> (au)         |                               | $\omega_{\text{FBH,T}}$ (eV)  |                               | $\omega_{\text{FBH}}$ (eV)    |                               | $\omega$ (eV) |
|---------------|-----|-----------|-----------------|-------------------------------|-------------------------------|-------------------------------|-------------------------------|-------------------------------|-------------------------------|---------------|
|               |     |           |                 | C <sub>2</sub> H <sub>4</sub> | C <sub>2</sub> F <sub>4</sub> | C <sub>2</sub> H <sub>4</sub> | C <sub>2</sub> F <sub>4</sub> | C <sub>2</sub> H <sub>4</sub> | C <sub>2</sub> F <sub>4</sub> |               |
| 6-31G(d)      | 1   | 0.623     | 0.631           | -0.001                        | 0.001                         | 0.013                         | 15.848                        | 0.005                         | 7.121                         | 7.126         |
|               | 2   | 0.005     | 0.003           | -0.999                        | 0.999                         | 33.086                        | -66.346                       | 0.466                         | 6.835                         | 7.301         |
|               | 3   | 0.005     | 0.013           | 0.998                         | -0.998                        | -28.154                       | 66.736                        | 7.274                         | 0.948                         | 8.222         |
|               | 4   | 0.882     | 0.959           | 0.000                         | 0.000                         | 3.671                         | -0.238                        | 7.819                         | 0.580                         | 8.399         |
|               | 5   | 0.536     | 0.588           | 0.000                         | 0.000                         | 5.876                         | 0.003                         | 8.516                         | -0.001                        | 8.515         |
| 6-31+G(d)     | 1   | 0.381     | 0.418           | -0.048                        | 0.048                         | 0.380                         | -49.180                       | 0.046                         | 6.444                         | 6.489         |
|               | 2   | 0.454     | 0.577           | -0.016                        | 0.016                         | 0.118                         | -4.107                        | 0.034                         | 6.681                         | 6.715         |
|               | 3   | 0.132     | 0.230           | 0.616                         | -0.616                        | -23.728                       | 9.127                         | 7.385                         | -0.213                        | 7.172         |
|               | 4   | 0.054     | 0.055           | -0.954                        | 0.954                         | 24.172                        | -64.363                       | -0.264                        | 7.468                         | 7.204         |
|               | 5   | 0.284     | 0.394           | -0.203                        | 0.203                         | 1.813                         | -43.498                       | 0.090                         | 7.363                         | 7.453         |
| 6-311G(d,p)   | 1   | 0.611     | 0.629           | -0.004                        | 0.004                         | 0.046                         | 14.459                        | 0.014                         | 7.055                         | 7.069         |
|               | 2   | 0.010     | 0.005           | -0.996                        | 0.997                         | 32.292                        | -66.606                       | 0.083                         | 7.206                         | 7.288         |
|               | 3   | 0.069     | 0.280           | 0.921                         | -0.921                        | -25.877                       | 62.109                        | 7.543                         | 0.561                         | 8.105         |
|               | 4   | 0.784     | 0.927           | 0.076                         | -0.076                        | 0.192                         | 5.080                         | 7.949                         | 0.175                         | 8.124         |
|               | 5   | 0.552     | 0.639           | 0.001                         | -0.001                        | 4.703                         | 0.050                         | 8.244                         | 0.003                         | 8.247         |
| 6-311++G(d,p) | 1   | 0.327     | 0.417           | -0.072                        | 0.072                         | 0.467                         | -49.832                       | 0.020                         | 6.517                         | 6.537         |
|               | 2   | 0.355     | 0.579           | -0.024                        | 0.024                         | 0.140                         | -3.860                        | 0.032                         | 6.702                         | 6.733         |
|               | 3   | 0.187     | 0.284           | 0.213                         | -0.213                        | -22.224                       | 2.807                         | 6.988                         | -0.068                        | 6.920         |
|               | 4   | 0.055     | 0.048           | -0.960                        | 0.960                         | 25.209                        | -64.984                       | -0.353                        | 7.555                         | 7.202         |
|               | 5   | 0.208     | 0.213           | 0.464                         | -0.464                        | -24.147                       | 7.010                         | 7.507                         | -0.167                        | 7.341         |
| cc-pVDZ       | 1   | 0.619     | 0.630           | -0.002                        | 0.002                         | 0.033                         | 14.943                        | 0.011                         | 7.086                         | 7.097         |
|               | 2   | 0.007     | 0.004           | -0.997                        | 0.997                         | 32.286                        | -66.363                       | 0.195                         | 6.986                         | 7.181         |
|               | 3   | 0.829     | 0.945           | 0.044                         | -0.044                        | 1.482                         | 2.848                         | 7.984                         | 0.242                         | 8.226         |
|               | 4   | 0.037     | 0.224           | 0.954                         | -0.954                        | -26.672                       | 64.118                        | 7.466                         | 0.781                         | 8.248         |
|               | 5   | 0.553     | 0.611           | 0.000                         | 0.000                         | 5.431                         | 0.011                         | 8.282                         | 0.000                         | 8.282         |
| aug-cc-pVDZ   | 1   | 0.287     | 0.404           | -0.085                        | 0.085                         | 0.516                         | -50.196                       | 0.016                         | 6.377                         | 6.393         |
|               | 2   | 0.305     | 0.557           | -0.034                        | 0.034                         | 0.183                         | -9.164                        | 0.043                         | 6.644                         | 6.686         |
|               | 3   | 0.185     | 0.288           | 0.195                         | -0.195                        | -22.487                       | 2.243                         | 6.925                         | -0.077                        | 6.848         |
|               | 4   | 0.038     | 0.052           | -0.953                        | 0.953                         | 24.564                        | -64.099                       | -0.359                        | 7.406                         | 7.047         |
|               | 5   | 0.234     | 0.298           | -0.393                        | 0.393                         | 2.236                         | -52.740                       | -0.084                        | 7.241                         | 7.157         |
| cc-pVTZ       | 1   | 0.598     | 0.625           | -0.006                        | 0.006                         | 0.068                         | 12.886                        | 0.021                         | 7.009                         | 7.031         |
|               | 2   | 0.013     | 0.008           | -0.995                        | 0.995                         | 30.827                        | -65.528                       | -0.065                        | 7.221                         | 7.157         |
|               | 3   | 0.854     | 0.931           | 0.002                         | -0.002                        | 0.662                         | 0.051                         | 7.871                         | 0.094                         | 7.965         |
|               | 4   | 0.556     | 0.622           | 0.001                         | -0.001                        | 3.657                         | 0.045                         | 8.136                         | 0.005                         | 8.141         |
|               | 5   | 0.345     | 0.381           | 0.050                         | -0.050                        | -12.953                       | 1.386                         | 8.038                         | 0.107                         | 8.145         |
| aug-cc-pVTZ   | 1   | 0.281     | 0.392           | -0.081                        | 0.081                         | 0.451                         | -51.470                       | 0.009                         | 6.338                         | 6.347         |
|               | 2   | 0.282     | 0.550           | -0.035                        | 0.035                         | 0.179                         | -10.509                       | 0.034                         | 6.659                         | 6.693         |
|               | 3   | 0.172     | 0.279           | 0.211                         | -0.211                        | -23.015                       | 2.270                         | 6.933                         | -0.089                        | 6.845         |
|               | 4   | 0.038     | 0.055           | -0.945                        | 0.945                         | 24.310                        | -64.447                       | -0.383                        | 7.404                         | 7.022         |
|               | 5   | 0.211     | 0.283           | -0.400                        | 0.400                         | 2.103                         | -54.157                       | -0.113                        | 7.235                         | 7.122         |

Table S9: LR-TDDFT Results of C<sub>2</sub>H<sub>4</sub>-C<sub>2</sub>F<sub>4</sub> **P2** configuration using the  $\omega$ B97X-D functional.

| Basis         | ES# | $\Lambda$ | S <sub>DA</sub> | Q <sub>FBH</sub> (au)         |                               | $\omega_{\text{FBH,T}}$ (eV)  |                               | $\omega_{\text{FBH}}$ (eV)    |                               | $\omega$ (eV) |
|---------------|-----|-----------|-----------------|-------------------------------|-------------------------------|-------------------------------|-------------------------------|-------------------------------|-------------------------------|---------------|
|               |     |           |                 | C <sub>2</sub> H <sub>4</sub> | C <sub>2</sub> F <sub>4</sub> | C <sub>2</sub> H <sub>4</sub> | C <sub>2</sub> F <sub>4</sub> | C <sub>2</sub> H <sub>4</sub> | C <sub>2</sub> F <sub>4</sub> |               |
| 6-31G(d)      | 1   | 0.623     | 0.631           | 0.000                         | 0.000                         | 0.008                         | 16.768                        | 0.004                         | 7.172                         | 7.177         |
|               | 2   | 0.882     | 0.958           | 0.000                         | 0.000                         | 3.918                         | -0.166                        | 7.868                         | 0.492                         | 8.360         |
|               | 3   | 0.536     | 0.579           | 0.000                         | 0.000                         | 5.973                         | -0.003                        | 8.580                         | -0.002                        | 8.579         |
|               | 4   | 0.863     | 0.941           | 0.000                         | 0.000                         | 0.253                         | -2.706                        | 0.506                         | 8.092                         | 8.597         |
|               | 5   | 0.006     | 0.006           | -0.999                        | 0.999                         | 32.785                        | -66.830                       | 1.493                         | 7.905                         | 9.397         |
| 6-31+G(d)     | 1   | 0.351     | 0.434           | -0.023                        | 0.023                         | 0.162                         | -47.723                       | 0.043                         | 6.773                         | 6.815         |
|               | 2   | 0.411     | 0.599           | -0.007                        | 0.007                         | 0.052                         | 2.727                         | 0.023                         | 6.851                         | 6.873         |
|               | 3   | 0.775     | 0.836           | 0.023                         | -0.023                        | -7.163                        | 0.124                         | 7.551                         | 0.103                         | 7.655         |
|               | 4   | 0.242     | 0.405           | 0.066                         | -0.066                        | -17.975                       | 0.784                         | 7.606                         | 0.057                         | 7.663         |
|               | 5   | 0.240     | 0.459           | -0.101                        | 0.101                         | 0.736                         | -35.381                       | 0.112                         | 7.890                         | 8.001         |
| 6-311G(d,p)   | 1   | 0.604     | 0.630           | -0.002                        | 0.002                         | 0.020                         | 15.735                        | 0.009                         | 7.123                         | 7.132         |
|               | 2   | 0.864     | 0.944           | 0.000                         | 0.000                         | 2.700                         | -0.037                        | 7.948                         | 0.128                         | 8.076         |
|               | 3   | 0.556     | 0.609           | 0.000                         | 0.000                         | 5.101                         | 0.001                         | 8.316                         | 0.001                         | 8.317         |
|               | 4   | 0.385     | 0.412           | 0.018                         | -0.018                        | -11.188                       | 0.426                         | 8.444                         | 0.088                         | 8.532         |
|               | 5   | 0.853     | 0.933           | 0.000                         | 0.000                         | 0.049                         | -2.701                        | 0.134                         | 8.415                         | 8.549         |
| 6-311++G(d,p) | 1   | 0.243     | 0.439           | -0.029                        | 0.029                         | 0.168                         | -48.218                       | 0.030                         | 6.811                         | 6.842         |
|               | 2   | 0.306     | 0.600           | -0.010                        | 0.010                         | 0.057                         | 3.162                         | 0.022                         | 6.868                         | 6.891         |
|               | 3   | 0.212     | 0.319           | 0.042                         | -0.042                        | -21.221                       | 0.349                         | 7.156                         | 0.035                         | 7.191         |
|               | 4   | 0.780     | 0.847           | 0.021                         | -0.021                        | -6.146                        | 0.107                         | 7.516                         | 0.096                         | 7.613         |
|               | 5   | 0.175     | 0.340           | 0.055                         | -0.055                        | -20.917                       | 0.417                         | 7.720                         | 0.098                         | 7.818         |
| cc-pVDZ       | 1   | 0.617     | 0.630           | -0.001                        | 0.001                         | 0.016                         | 16.103                        | 0.008                         | 7.151                         | 7.159         |
|               | 2   | 0.871     | 0.950           | 0.000                         | 0.000                         | 2.987                         | -0.055                        | 7.984                         | 0.190                         | 8.174         |
|               | 3   | 0.554     | 0.595           | 0.000                         | 0.000                         | 5.659                         | -0.002                        | 8.358                         | 0.000                         | 8.358         |
|               | 4   | 0.854     | 0.932           | 0.000                         | 0.000                         | 0.079                         | -2.526                        | 0.198                         | 8.361                         | 8.559         |
|               | 5   | 0.399     | 0.423           | 0.012                         | -0.012                        | -8.053                        | 0.318                         | 8.886                         | 0.070                         | 8.957         |
| aug-cc-pVDZ   | 1   | 0.214     | 0.429           | -0.035                        | 0.035                         | 0.188                         | -48.307                       | 0.033                         | 6.693                         | 6.725         |
|               | 2   | 0.285     | 0.588           | -0.013                        | 0.013                         | 0.074                         | -0.225                        | 0.030                         | 6.847                         | 6.877         |
|               | 3   | 0.217     | 0.319           | 0.043                         | -0.043                        | -21.721                       | 0.309                         | 7.078                         | 0.021                         | 7.099         |
|               | 4   | 0.759     | 0.838           | 0.022                         | -0.022                        | -6.640                        | 0.111                         | 7.481                         | 0.092                         | 7.574         |
|               | 5   | 0.153     | 0.305           | 0.055                         | -0.055                        | -21.852                       | 0.328                         | 7.642                         | 0.060                         | 7.702         |
| cc-pVTZ       | 1   | 0.585     | 0.628           | -0.003                        | 0.003                         | 0.029                         | 14.876                        | 0.015                         | 7.107                         | 7.122         |
|               | 2   | 0.853     | 0.929           | 0.000                         | 0.000                         | 0.903                         | -0.018                        | 7.829                         | 0.091                         | 7.920         |
|               | 3   | 0.558     | 0.601           | 0.000                         | 0.000                         | 4.063                         | 0.005                         | 8.217                         | 0.003                         | 8.221         |
|               | 4   | 0.352     | 0.399           | 0.021                         | -0.021                        | -12.045                       | 0.431                         | 8.374                         | 0.084                         | 8.459         |
|               | 5   | 0.844     | 0.924           | 0.000                         | 0.000                         | 0.015                         | -2.643                        | 0.091                         | 8.392                         | 8.483         |
| aug-cc-pVTZ   | 1   | 0.190     | 0.408           | -0.036                        | 0.036                         | 0.169                         | -50.630                       | 0.025                         | 6.626                         | 6.652         |
|               | 2   | 0.263     | 0.580           | -0.014                        | 0.014                         | 0.071                         | -2.047                        | 0.025                         | 6.863                         | 6.888         |
|               | 3   | 0.189     | 0.308           | 0.047                         | -0.047                        | -22.489                       | 0.294                         | 7.063                         | 0.022                         | 7.086         |
|               | 4   | 0.707     | 0.834           | 0.024                         | -0.024                        | -6.735                        | 0.099                         | 7.483                         | 0.089                         | 7.573         |
|               | 5   | 0.127     | 0.275           | 0.062                         | -0.062                        | -22.858                       | 0.305                         | 7.602                         | 0.063                         | 7.665         |

Table S10: ESP, FBH, and Becke fragment charges ( $Q_A$ ), FBH and Becke fragment excitation energies ( $\omega_A$ ) for the lowest local excitations and charge-transfer excitations of three  $C_2H_4$ - $C_2F_4$  configurations. Obtained from LR-TDDFT calculations using the PBE0 functional and 6-31G(d) basis set.

| Config    | ES# | $Q_A^{\text{ESP}}$ (a.u.) |          | $Q_A^{\text{FBH}}$ (a.u.) |          | $Q_A^{\text{Becke}}$ (a.u.) |          | $\omega_A^{\text{FBH}}$ (eV) |          | $\omega_A^{\text{Becke}}$ (eV) |          |
|-----------|-----|---------------------------|----------|---------------------------|----------|-----------------------------|----------|------------------------------|----------|--------------------------------|----------|
|           |     | $C_2H_4$                  | $C_2F_4$ | $C_2H_4$                  | $C_2F_4$ | $C_2H_4$                    | $C_2F_4$ | $C_2H_4$                     | $C_2F_4$ | $C_2H_4$                       | $C_2F_4$ |
| <b>F</b>  | 2   | 0.006                     | -0.006   | 0.000                     | 0.000    | 0.000                       | 0.000    | -0.003                       | 7.129    | -0.002                         | 7.128    |
| <b>P1</b> | 1   | -0.041                    | 0.041    | -0.010                    | 0.010    | -0.010                      | 0.010    | 0.026                        | 7.074    | 0.022                          | 7.078    |
| <b>P2</b> | 1   | 0.019                     | -0.019   | -0.001                    | 0.001    | -0.001                      | 0.001    | 0.005                        | 7.121    | 0.004                          | 7.123    |
| <b>F</b>  | 1   | -0.967                    | 0.967    | -0.997                    | 0.997    | -0.997                      | 0.997    | 0.315                        | 6.698    | 0.307                          | 6.706    |
| <b>P1</b> | 2   | -1.016                    | 1.016    | -0.990                    | 0.990    | -0.988                      | 0.988    | 0.426                        | 6.819    | 0.423                          | 6.821    |
| <b>P2</b> | 2   | -0.964                    | 0.964    | -0.999                    | 0.999    | -0.997                      | 0.997    | 0.466                        | 6.835    | 0.463                          | 6.839    |

### 3 Grid-Based and Nucleus-Based Partitioning of Nuclear Attraction Energies

Two schemes were proposed by Nakai and coworkers <sup>[1]</sup> to decompose the ground-state nuclear-electron attraction energy,

$$E_A^{N,g} = - \int w_A(\mathbf{r})\rho(\mathbf{r}) \sum_n \frac{Z_n}{|\mathbf{r} - \mathbf{R}_n|} d\mathbf{r} \quad (\text{S1})$$

$$E_A^{N,n} = - \int \rho(\mathbf{r}) \sum_{n \in A} \frac{Z_n}{|\mathbf{r} - \mathbf{R}_n|} d\mathbf{r} \quad (\text{S2})$$

where  $\rho(\mathbf{r})$  is the ground-state electron density. Ground state partitioning results for the three C<sub>2</sub>H<sub>4</sub>-C<sub>2</sub>F<sub>4</sub> configurations are collected in Table S11, while the corresponding excited state results are tabulated in Table S12.

Table S11: Grid-based ( $E_A^{N,g}$ ) and nucleus-based ( $E_A^{N,n}$ ) partitioning of the ground-state nuclear attraction energy of three C<sub>2</sub>H<sub>4</sub>-C<sub>2</sub>F<sub>4</sub> configurations. FBH and Becke weights, PBE functional, and 6-31G(d) basis set are used in these calculations.

| Config    | $E_{A,\text{FBH}}^{N,g}$ (a.u.) |                               | $E_{A,\text{Becke}}^{N,g}$ (a.u.) |                               | $E_A^{N,n}$ (a.u.)            |                               |
|-----------|---------------------------------|-------------------------------|-----------------------------------|-------------------------------|-------------------------------|-------------------------------|
|           | C <sub>2</sub> H <sub>4</sub>   | C <sub>2</sub> F <sub>4</sub> | C <sub>2</sub> H <sub>4</sub>     | C <sub>2</sub> F <sub>4</sub> | C <sub>2</sub> H <sub>4</sub> | C <sub>2</sub> F <sub>4</sub> |
| <b>F</b>  | -325.226                        | -1696.137                     | -325.218                          | -1696.145                     | -325.110                      | -1696.253                     |
| <b>P1</b> | -329.569                        | -1700.528                     | -329.506                          | -1700.591                     | -329.616                      | -1700.482                     |
| <b>P2</b> | -315.608                        | -1686.667                     | -315.581                          | -1686.694                     | -315.651                      | -1686.624                     |

Table S12: Grid-based ( $\omega_A^{N,g}$ ) and nucleus-based ( $\omega_A^{N,n}$ ) partitioning of the nuclear attraction term of excitation energies of three  $C_2H_4$ - $C_2F_4$  configurations. Based on Eqs. 38 and 39 of the main text. FBH and Becke weights, PBE functional, and 6-31G(d) basis set are used in these calculations.

| Config    | ES#    | $\omega_{A,FBH}^{N,g}$ (eV) |          | $\omega_{A,Becke}^{N,g}$ (eV) |          | $\omega_A^{N,n}$ (eV) |          |
|-----------|--------|-----------------------------|----------|-------------------------------|----------|-----------------------|----------|
|           |        | $C_2H_4$                    | $C_2F_4$ | $C_2H_4$                      | $C_2F_4$ | $C_2H_4$              | $C_2F_4$ |
| <b>F</b>  | 1 (CT) | -340.693                    | 567.264  | -340.607                      | 567.178  | -164.087              | 390.658  |
|           | 2 (LE) | 0.388                       | -17.173  | 0.383                         | -17.168  | 0.516                 | -17.301  |
|           | 3 (CT) | 350.255                     | -562.201 | 350.213                       | -562.158 | 172.697               | -384.643 |
|           | 4 (CT) | 350.196                     | -584.470 | 350.139                       | -584.413 | 173.184               | -407.458 |
|           | 5 (CT) | -272.400                    | 567.175  | -272.339                      | 567.113  | -102.471              | 397.246  |
| <b>P1</b> | 1 (CT) | -344.020                    | 568.554  | -343.998                      | 568.532  | -163.225              | 387.759  |
|           | 2 (CT) | 353.910                     | -563.295 | 353.893                       | -563.278 | 172.387               | -381.771 |
|           | 3 (LE) | -10.111                     | 3.085    | -9.655                        | 2.628    | -4.164                | -2.862   |
|           | 4 (CT) | 346.750                     | -572.338 | 347.100                       | -572.689 | 168.940               | -394.528 |
|           | 5 (CT) | -234.415                    | 456.512  | -230.434                      | 452.530  | -81.876               | 303.972  |
| <b>P2</b> | 1 (CT) | -322.475                    | 560.521  | -322.447                      | 560.494  | -171.287              | 409.333  |
|           | 2 (CT) | 330.095                     | -555.583 | 330.091                       | -555.579 | 180.098               | -405.586 |
|           | 3 (LE) | -0.440                      | -15.770  | -0.417                        | -15.793  | -0.047                | -16.163  |
|           | 4 (CT) | 329.739                     | -577.428 | 329.755                       | -577.444 | 180.119               | -427.808 |
|           | 5 (LE) | -11.008                     | 0.033    | -11.055                       | 0.080    | -12.011               | 1.035    |

## 4 Geometry of C<sub>2</sub>H<sub>4</sub>-C<sub>2</sub>F<sub>4</sub> Complexes

Energy values (in Hartree) and nuclear coordinates (in Å) of C<sub>2</sub>H<sub>4</sub>-C<sub>2</sub>F<sub>4</sub> configurations, whose monomer geometries were optimized on the  $\omega$ B97X-D/6-311++G(d,p) level of theory.

```
F
12
-554.0963807
C      0.6628906040   0.0000000000  -2.5000000000
C     -0.6628906040   0.0000000000  -2.5000000000
H      1.2317033864   0.9241285878  -2.5000000000
H      1.2317033864  -0.9241285878  -2.5000000000
H     -1.2317033864   0.9241285878  -2.5000000000
H     -1.2317033864  -0.9241285878  -2.5000000000
C      0.6595916614   0.0000000000   2.5000000000
C     -0.6595916614   0.0000000000   2.5000000000
F      1.3822221343   1.0961774622   2.5000000000
F      1.3822221343  -1.0961774622   2.5000000000
F     -1.3822221343  -1.0961774622   2.5000000000
F     -1.3822221343   1.0961774622   2.5000000000
```

```
P1
12
-554.0965940
C      0.6628906040  -2.5000000000   0.0000000000
C     -0.6628906040  -2.5000000000   0.0000000000
H      1.2317033864  -1.5758714122   0.0000000000
H      1.2317033864  -3.4241285878   0.0000000000
H     -1.2317033864  -1.5758714122   0.0000000000
H     -1.2317033864  -3.4241285878   0.0000000000
C      0.6595916614   2.5000000000   0.0000000000
C     -0.6595916614   2.5000000000   0.0000000000
F      1.3822221343   3.5961774622   0.0000000000
F      1.3822221343   1.4038225378   0.0000000000
F     -1.3822221343   1.4038225378   0.0000000000
F     -1.3822221343   3.5961774622   0.0000000000
```

```
P2
12
-554.0959918
C     -2.5000000000   0.0000000000   0.0000000000
C     -3.8257812080   0.0000000000   0.0000000000
H     -1.9311872176   0.9241285878   0.0000000000
H     -1.9311872176  -0.9241285878   0.0000000000
H     -4.3945939904   0.9241285878   0.0000000000
H     -4.3945939904  -0.9241285878   0.0000000000
C      3.8191833228   0.0000000000   0.0000000000
C      2.5000000000   0.0000000000   0.0000000000
F      4.5418137957   1.0961774622   0.0000000000
F      4.5418137957  -1.0961774622   0.0000000000
F      1.7773695271  -1.0961774622   0.0000000000
F      1.7773695271   1.0961774622   0.0000000000
```

## 5 Geometry of OLH-water Complexes

Energy values (in Hartree) and optimized nuclear coordinates (in Å) of OLH-water configurations using the  $\omega$ B97X-D/6-311++G(d,p) level of theory.

```
HB1
25
```

-1517.3893302

|   |               |               |               |
|---|---------------|---------------|---------------|
| O | 4.2538611198  | -1.7102968078 | -0.1350976023 |
| C | 3.3964102437  | -0.8640460222 | -0.0859406977 |
| N | 2.0273555376  | -1.1458831479 | -0.0973289914 |
| C | 1.3242793726  | -0.0708136003 | -0.0278193880 |
| S | 2.1176375128  | 1.4902628698  | 0.0622830011  |
| C | 3.7077245615  | 0.6328554136  | -0.0052917195 |
| H | 4.3138184598  | 0.8368822411  | 0.8777987212  |
| H | 4.2834701088  | 0.9340393659  | -0.8810678458 |
| C | -0.1353073011 | -0.1142940247 | -0.0213642704 |
| S | -0.9789467739 | -1.6479280033 | -0.1202116923 |
| N | -0.8653056269 | 0.9466227640  | 0.0560134334  |
| C | -3.7741242270 | -1.2532458443 | -0.0762464236 |
| C | -2.4713989033 | -0.7633500956 | -0.0506952797 |
| C | -2.1987357592 | 0.6160598787  | 0.0430297164  |
| C | -3.2599006526 | 1.5252024173  | 0.1151242163  |
| C | -4.5510605475 | 1.0484584333  | 0.0915766709  |
| C | -4.8070093427 | -0.3337940158 | -0.0042851212 |
| O | -6.0716069925 | -0.8218348565 | -0.0301146719 |
| H | -3.9986916083 | -2.3094071051 | -0.1498797088 |
| H | -3.0518198573 | 2.5854334539  | 0.1897401919  |
| H | -5.3849462344 | 1.7411819787  | 0.1483214212  |
| H | -6.7047270793 | -0.1045243627 | 0.0268935355  |
| O | 6.6343604358  | -0.2168495670 | 0.1563320983  |
| H | 6.0017953469  | -0.9397810477 | 0.0343875855  |
| H | 7.4890590282  | -0.6323942618 | 0.2664158559  |

HB2

25

-1517.3851365

|   |               |               |               |
|---|---------------|---------------|---------------|
| O | 5.0259513484  | -2.0014583322 | -0.0316786647 |
| C | 4.2870055691  | -1.0599050082 | -0.0195902268 |
| N | 2.8819536360  | -1.1520773836 | -0.0226945452 |
| C | 2.3299593991  | 0.0045091464  | -0.0092913001 |
| S | 3.3252712664  | 1.4573053635  | 0.0102155570  |
| C | 4.7872245795  | 0.3941181819  | 0.0016537620  |
| H | 5.3923123267  | 0.5531723007  | 0.8943126994  |
| H | 5.4005646549  | 0.5775573914  | -0.8805935767 |
| C | 0.8766259455  | 0.1614966296  | -0.0095077730 |
| S | -0.1660211427 | -1.2461002185 | -0.0233549430 |
| N | 0.2997054642  | 1.3153765189  | 0.0013697439  |
| C | -2.8810978010 | -0.4791167950 | -0.0178181022 |
| C | -1.5241528495 | -0.1649122829 | -0.0148740276 |
| C | -1.0672891776 | 1.1677582022  | -0.0013652846 |
| C | -1.9937927795 | 2.2153360921  | 0.0095735641  |
| C | -3.3381914072 | 1.9163637961  | 0.0038500803  |
| C | -3.7720016050 | 0.5786566290  | -0.0106176172 |
| O | -5.1051569251 | 0.2750575801  | -0.0211521256 |
| H | -3.2505920093 | -1.4982578426 | -0.0204390721 |
| H | -1.6431137918 | 3.2398060457  | 0.0209210291  |
| H | -4.0705213241 | 2.7177214825  | 0.0090674630  |
| H | -5.6308461690 | 1.0720591820  | 0.0620210063  |
| O | -5.3641244758 | -2.6073825078 | 0.1204771076  |
| H | -5.5810960020 | -1.6704576957 | 0.0619820363  |
| H | -5.9193651539 | -3.0449055372 | -0.5245561629 |

T1.6

25

-1517.3649052

|   |               |               |               |
|---|---------------|---------------|---------------|
| O | -4.7930287203 | 1.5941094205  | 0.1280499006  |
| C | -3.9435865972 | 0.7517553082  | 0.0922975267  |
| N | -2.5601893057 | 1.0176468787  | 0.0884265343  |
| C | -1.8707695535 | -0.0622449643 | 0.0490702525  |
| S | -2.6766812938 | -1.6253285409 | 0.0057999983  |
| C | -4.2597126006 | -0.7518015777 | 0.0466498860  |
| H | -4.8347924661 | -1.0267494424 | 0.9309521335  |
| H | -4.8500930330 | -0.9697932719 | -0.8433737380 |
| C | -0.4091348319 | -0.0346182506 | 0.0421194685  |



|   |              |               |              |
|---|--------------|---------------|--------------|
| S | 0.4458955352 | 1.4974835522  | 0.0859023645 |
| N | 0.3117963693 | -1.1019367688 | 0.0037510161 |
| C | 3.2400505115 | 1.0788022798  | 0.1056610113 |
| C | 1.9303205691 | 0.5999987520  | 0.0505104515 |
| C | 1.6470148267 | -0.7821615018 | 0.0093919767 |
| C | 2.7030881473 | -1.7026849679 | 0.0265958224 |
| C | 3.9993285342 | -1.2368589283 | 0.0790654603 |
| C | 4.2691419939 | 0.1478199993  | 0.1184032553 |
| O | 5.5302595850 | 0.6256924374  | 0.2038209922 |
| H | 3.4719340383 | 2.1337511749  | 0.1712485626 |
| H | 2.4864778886 | -2.7629689814 | 0.0354238488 |
| H | 4.8231418407 | -1.9400358178 | 0.1341814217 |
| H | 6.1520619473 | -0.0953473168 | 0.3166390784 |
| H | 2.9196211740 | -0.3555486229 | 1.6841345732 |
| O | 2.9124016296 | -0.4777833107 | 2.6509028988 |
| H | 2.5461490113 | 0.3323871612  | 3.0054092039 |

T1.7

25  
-1517.3702160

|   |               |               |               |
|---|---------------|---------------|---------------|
| O | -4.7955588337 | 1.5942681066  | 0.1207736146  |
| C | -3.9458103010 | 0.7521828067  | 0.0863554274  |
| N | -2.5624496420 | 1.0185782990  | 0.0841115317  |
| C | -1.8726395865 | -0.0610205586 | 0.0451429217  |
| S | -2.6779774173 | -1.6244548722 | 0.0013729286  |
| C | -4.2613459832 | -0.7514966895 | 0.0409266175  |
| H | -4.8366808273 | -1.0263481110 | 0.9251138257  |
| H | -4.8513161715 | -0.9700489235 | -0.8492154203 |
| C | -0.4109046876 | -0.0332429320 | 0.0384745670  |
| S | 0.4445454891  | 1.4984717655  | 0.0825523376  |
| N | 0.3095831484  | -1.1008504576 | 0.0005495449  |
| C | 3.2383471771  | 1.0788304120  | 0.0953702795  |
| C | 1.9289818219  | 0.6001947097  | 0.0475609229  |
| C | 1.6453788987  | -0.7812954558 | 0.0065322078  |
| C | 2.7004751955  | -1.7019662586 | 0.0171444854  |
| C | 3.9967404977  | -1.2364029162 | 0.0633689901  |
| C | 4.2667675921  | 0.1477671107  | 0.1008820777  |
| O | 5.5293404089  | 0.6254821159  | 0.1710477277  |
| H | 3.4710188436  | 2.1340491245  | 0.1541219872  |
| H | 2.4836859210  | -2.7623211380 | 0.0206186998  |
| H | 4.8214125529  | -1.9394843362 | 0.1076784087  |
| H | 6.1524277850  | -0.0958209687 | 0.2745542877  |
| H | 2.9359488118  | -0.3568752410 | 1.7696232561  |
| O | 2.9281144718  | -0.4808407006 | 2.7320471916  |
| H | 2.5526100347  | 0.3262298088  | 3.0843254814  |

T1.8

25  
-1517.3742191

|   |               |               |               |
|---|---------------|---------------|---------------|
| O | -4.7968532131 | 1.5949258404  | 0.1184197734  |
| C | -3.9470461237 | 0.7529597990  | 0.0831815456  |
| N | -2.5636671113 | 1.0195929632  | 0.0795659686  |
| C | -1.8737668599 | -0.0599096642 | 0.0406064958  |
| S | -2.6789034001 | -1.6234927394 | -0.0018750736 |
| C | -4.2623927878 | -0.7507682652 | 0.0379376727  |
| H | -4.8376114015 | -1.0256645487 | 0.9221717339  |
| H | -4.8523929855 | -0.9694168588 | -0.8521716536 |
| C | -0.4119345297 | -0.0321278506 | 0.0329180485  |
| S | 0.4438482500  | 1.4994007964  | 0.0753794164  |
| N | 0.3082052793  | -1.0999611371 | -0.0037577130 |
| C | 3.2375880945  | 1.0788138977  | 0.0827550972  |
| C | 1.9284288743  | 0.6005242826  | 0.0412740847  |
| C | 1.6444866690  | -0.7806061013 | 0.0017438672  |
| C | 2.6988852950  | -1.7014426106 | 0.0059827358  |
| C | 3.9953652089  | -1.2362025678 | 0.0464164310  |
| C | 4.2654634735  | 0.1476094486  | 0.0834800627  |
| O | 5.5289781579  | 0.6253587424  | 0.1410915681  |
| H | 3.4710305073  | 2.1342166627  | 0.1353732787  |

|   |              |               |              |
|---|--------------|---------------|--------------|
| H | 2.4817554629 | -2.7618207042 | 0.0044147170 |
| H | 4.8206490362 | -1.9393279535 | 0.0790099207 |
| H | 6.1526408892 | -0.0953523035 | 0.2452023944 |
| H | 2.9476613567 | -0.3688964003 | 1.8538059641 |
| O | 2.9455946340 | -0.4779137081 | 2.8149313048 |
| H | 2.5446824240 | 0.3230856804  | 3.1531762590 |

T1.9

25

-1517.3771603

|   |               |               |               |
|---|---------------|---------------|---------------|
| O | -4.7968675731 | 1.5969244894  | 0.1115908846  |
| C | -3.9471539640 | 0.7547940529  | 0.0781467068  |
| N | -2.5637400985 | 1.0212339032  | 0.0752939694  |
| C | -1.8739343005 | -0.0583532008 | 0.0375620770  |
| S | -2.6793094404 | -1.6219163055 | -0.0037176884 |
| C | -4.2626778889 | -0.7489462961 | 0.0348870850  |
| H | -4.8378797157 | -1.0225625729 | 0.9195481137  |
| H | -4.8528097419 | -0.9688068439 | -0.8548252038 |
| C | -0.4120996874 | -0.0308128581 | 0.0297892076  |
| S | 0.4442160741  | 1.5004275090  | 0.0706651510  |
| N | 0.3077156535  | -1.0989174518 | -0.0062854634 |
| C | 3.2375640202  | 1.0794057968  | 0.0697182360  |
| C | 1.9287570292  | 0.6008588306  | 0.0367250656  |
| C | 1.6443264470  | -0.7799189729 | -0.0019549414 |
| C | 2.6984471837  | -1.7007093353 | -0.0034989065 |
| C | 3.9950118825  | -1.2352781115 | 0.0297273436  |
| C | 4.2652175704  | 0.1483418823  | 0.0640001228  |
| O | 5.5292886489  | 0.6262094931  | 0.1093128494  |
| H | 3.4712834828  | 2.1350799783  | 0.1156573172  |
| H | 2.4817406969  | -2.7612351056 | -0.0080874762 |
| H | 4.8208550826  | -1.9382705915 | 0.0528557460  |
| H | 6.1544745760  | -0.0945954917 | 0.2029486309  |
| H | 2.9562608170  | -0.3850780958 | 1.9391950678  |
| O | 2.9622636145  | -0.4750309404 | 2.8998746214  |
| H | 2.5197448310  | 0.3107409384  | 3.2219053837  |

T2.0

25

-1517.3792127

|   |               |               |               |
|---|---------------|---------------|---------------|
| O | -4.7958109488 | 1.5994521710  | 0.1159949457  |
| C | -3.9465898952 | 0.7570321045  | 0.0791366150  |
| N | -2.5629704137 | 1.0229013275  | 0.0749881151  |
| C | -1.8737414434 | -0.0569362822 | 0.0351588288  |
| S | -2.6798016947 | -1.6200724728 | -0.0078915815 |
| C | -4.2627924343 | -0.7464710380 | 0.0324964653  |
| H | -4.8385167305 | -1.0218936253 | 0.9162198349  |
| H | -4.8525568633 | -0.9639512233 | -0.8580696431 |
| C | -0.4118070575 | -0.0298396414 | 0.0262855317  |
| S | 0.4448260510  | 1.5012244491  | 0.0657021497  |
| N | 0.3076339244  | -1.0982582224 | -0.0092123827 |
| C | 3.2377369931  | 1.0797384525  | 0.0576616036  |
| C | 1.9293966431  | 0.6011483514  | 0.0316933418  |
| C | 1.6445903777  | -0.7793892411 | -0.0056562399 |
| C | 2.6981447968  | -1.7002252800 | -0.0117990616 |
| C | 3.9951807319  | -1.2347245886 | 0.0163437312  |
| C | 4.2653256116  | 0.1487603764  | 0.0478748764  |
| O | 5.5297676302  | 0.6272060702  | 0.0820648661  |
| H | 3.4718930773  | 2.1355163930  | 0.0991483349  |
| H | 2.4813210081  | -2.7608007411 | -0.0182635215 |
| H | 4.8211632324  | -1.9378926706 | 0.0328705594  |
| H | 6.1566315597  | -0.0934416407 | 0.1650418543  |
| H | 3.0064570805  | -0.4208423347 | 2.0248812018  |
| O | 2.9744591403  | -0.4574765578 | 2.9869204814  |
| H | 2.4507548233  | 0.3028205642  | 3.2414429934  |

T2.1

25

-1517.3806181

|   |               |               |               |
|---|---------------|---------------|---------------|
| O | -4.7915291530 | 1.6011037138  | 0.1067271921  |
| C | -3.9418644182 | 0.7589026106  | 0.0751581744  |
| N | -2.5584517092 | 1.0255223246  | 0.0661440469  |
| C | -1.8685971699 | -0.0541110863 | 0.0322003096  |
| S | -2.6738980271 | -1.6180615542 | 0.0028485902  |
| C | -4.2573105527 | -0.7451053664 | 0.0416304741  |
| H | -4.8295770056 | -1.0137300490 | 0.9297158820  |
| H | -4.8503052712 | -0.9702619077 | -0.8448462642 |
| C | -0.4067291796 | -0.0262920921 | 0.0189812075  |
| S | 0.4494724423  | 1.5051619002  | 0.0471696316  |
| N | 0.3130165947  | -1.0947567947 | -0.0117611159 |
| C | 3.2424447544  | 1.0846369658  | 0.0313473585  |
| C | 1.9346962538  | 0.6053076721  | 0.0142902655  |
| C | 1.6501774768  | -0.7754728907 | -0.0140928344 |
| C | 2.7043520012  | -1.6960374644 | -0.0201721358 |
| C | 4.0009205712  | -1.2295162560 | 0.0002595819  |
| C | 4.2701671461  | 0.1541616333  | 0.0227516099  |
| O | 5.5347033476  | 0.6331720970  | 0.0444434234  |
| H | 3.4760659813  | 2.1408633995  | 0.0627745411  |
| H | 2.4880780579  | -2.7568144607 | -0.0235426314 |
| H | 4.8276433441  | -1.9320195355 | 0.0112802593  |
| H | 6.1624419123  | -0.0866320158 | 0.1278205766  |
| H | 2.9461494127  | -0.4527285337 | 2.1043103744  |
| O | 2.9703410905  | -0.4625130114 | 3.0658010651  |
| H | 2.3982872997  | 0.2588054017  | 3.3297943176  |

## References

- [1] Y. Imamura, A. Takahashi and H. Nakai, Grid-based energy density analysis: Implementation and assessment, *J. Chem. Phys.*, 2007, **126**, 034103
